# Supplementary material
Source: MDPI journal article supplement (https://www.mdpi.com/1424-8247/16/5/703)
Supplement: s1 [file s1]

## Supplementary figure 1

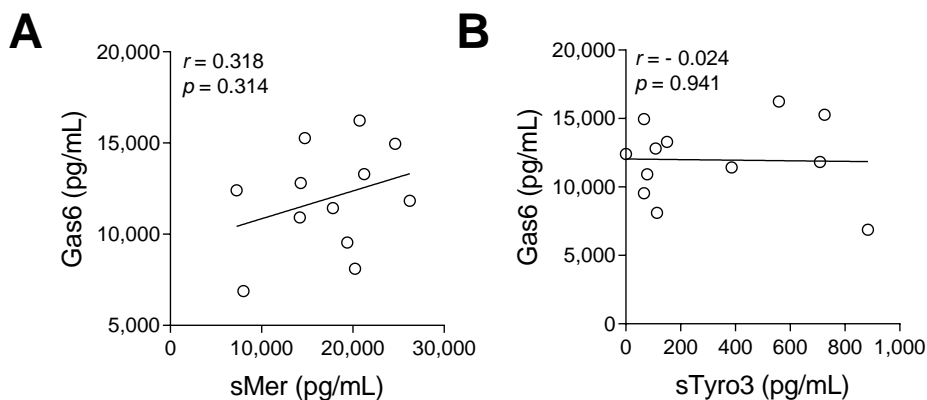

**Supplementary figure 1. Correlations between Gas6 and soluble Mer and Tyro3 in synovial fluids of OA patients.** Soluble Mer (sMer), soluble Tyro3 (sTyro3) and Gas6 levels were determined in synovial fluids of OA patients ( $n=12$ ) by ELISA. The correlations between sMer and Gas6 (A) and sTyro3 and Gas6 (B) were evaluated by Person's coefficients. Data are presented as the Pearson  $r$  value ( $r$ ) and  $p$  value ( $p$ ) for each correlation.

# Supplementary figure 2

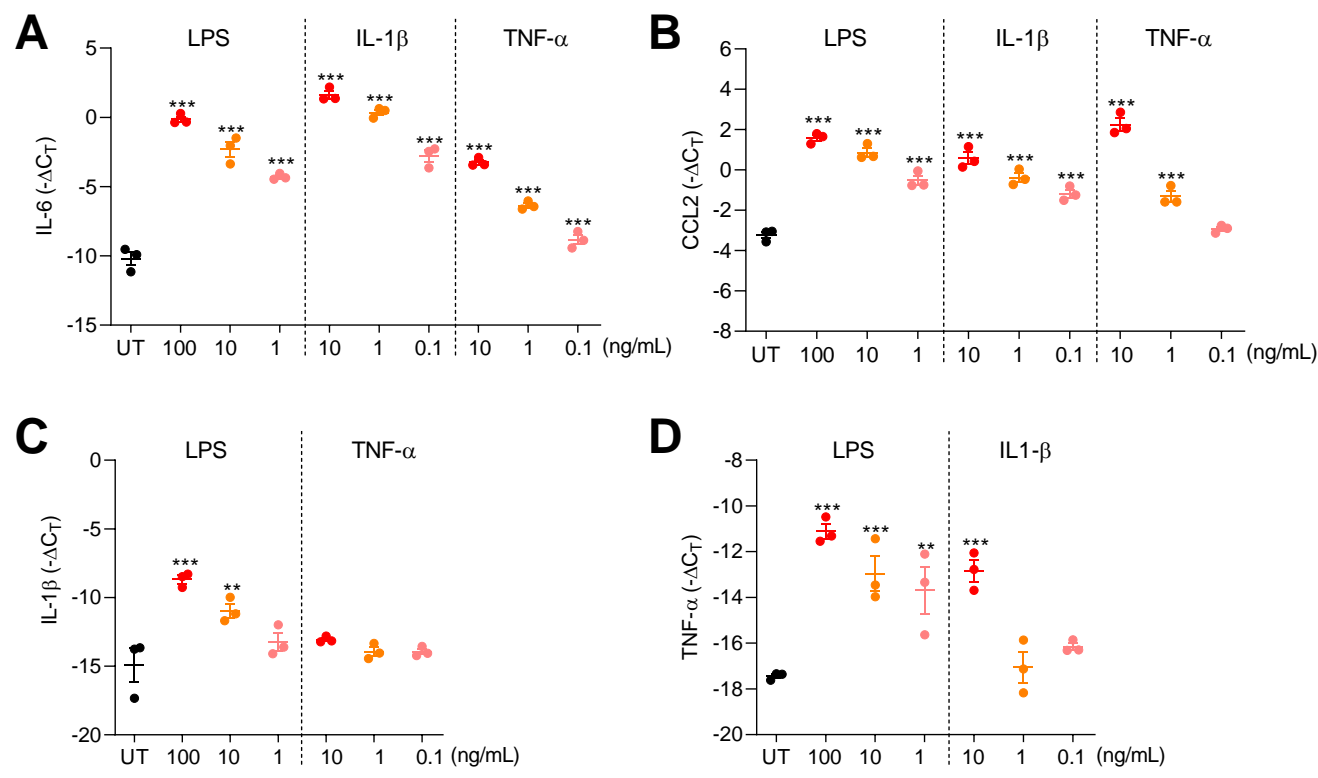

**Supplementary figure 2. Dose response of LPS, IL-1 $\beta$  and TNF- $\alpha$  and the expression of inflammatory markers on OAFLS.** OA synovial fibroblasts (OAFLS) were stimulated with LPS (10ng/ml) or the recombinants human IL-1 $\beta$  (0.1ng/ml) and TNF- $\alpha$  (1ng/ml) for 24h. Cells were processed for qPCR analyses of the pro-inflammatory cytokines IL-6 (A), CCL2 (B), IL-1 $\beta$  (C) and TNF- $\alpha$  (D). Results are shown as the mean  $\pm$  SEM. \* $P < 0.05$ , \*\*\* $P < 0.001$  when comparing LPS with untreated (UT) group. P values were determined by ANOVA with post hoc Tukey's multiple comparison test.

## Supplementary figure 3

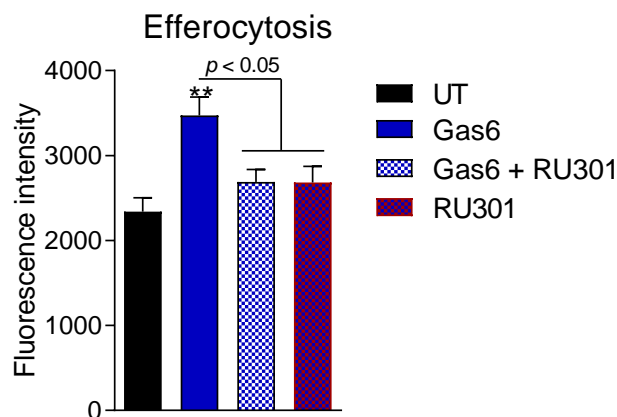

**Supplementary figure 3. Evaluation of efferocytosis mediated by Gas6-conditioned medium in THP-1 cells.** THP-1 cells were stimulated with PMA (20 ng/ml) for 24h. Human peripheral blood neutrophils were pre-treated with staurosporine (2  $\mu$ M) to induce apoptosis and labelled with pHrodo succinimidyl ester (40ng/ml). THP-1 cells were pre-treated with a pan-TAM inhibitor RU301 (10uM). Apoptotic neutrophils were pre-incubated with Gas6-CM (16 $\mu$ m) for 30 minutes. The efferocytosis assay was performed by co-culturing THP-1 cells with apoptotic neutrophils in a proportion of 10 neutrophils per macrophage. Fluorescence of pHrodo was measured at 590 nm. \*P < 0.05, when comparing Gas6-CM treated group with untreated (UT) group. P values were determined by ANOVA with post hoc Tukey's multiple comparison test.

# Supplementary figure 4

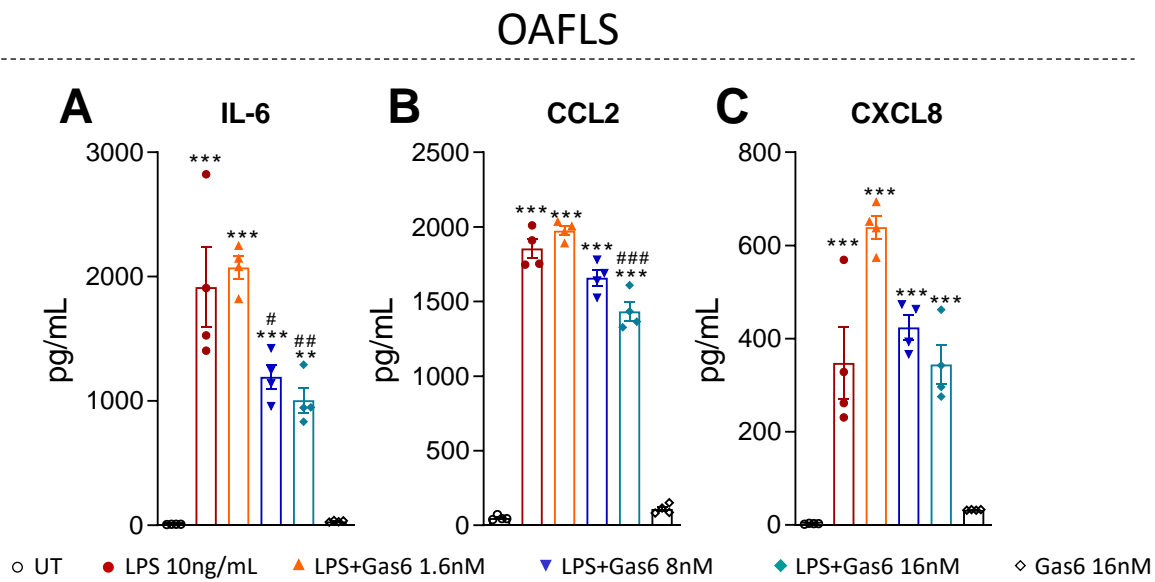

**Supplementary figure 4. Effect of Gas6-CM on cytokine production in the supernatants of OAFLS.** OA synovial fibroblasts (OAFLS) were pre-treated with Gas6-CM (16nM) for 1h and then, stimulated for 24h with LPS (10ng/ml). The pro-inflammatory cytokines IL-6 (A), CCL2 (B), and CXCL8 (C) were analyzed by multiplex ELISA in the supernatants. Results are shown as the mean ± SEM. \*\*\*P < 0.001 when comparing with untreated (UT) group. #P < 0.05, ##P < 0.01, and ###P < 0.001 when comparing LPS+Gas6 treated with LPS group. P values were determined by ANOVA with post hoc Tukey's test (multiple groups).

# Supplementary Table 1

Table S1. Primers sequences used in this study.

| Gene         | Forward sequence           | Reverse sequence         |
|--------------|----------------------------|--------------------------|
| <i>IL6</i>   | AGCCCACCGGGAACGA           | GGACCGAAGGCGCTTGT        |
| <i>CCL2</i>  | CGCTCAGCCAGATGCAATC        | GCCTCTGCACTGAGATCTTCCT   |
| <i>TNFA</i>  | TCTTCTCGAACCCCGAGTGA       | CCTCTGATGGCACCACCAG      |
| <i>IL1B</i>  | TGGGTAATTTTTGGGATCTACACTCT | AATCTGTACCTGTCCTGCGTGTT  |
| <i>CXCL8</i> | AGAAGTTTTTGAAGAGGGCTGAGA   | CAGACCCACACAATACATGAAGTG |
| <i>AXL</i>   | CAGCTCAGAATCACCTCCC        | ACACGAAGGTCTGATGTCC      |
| <i>MER</i>   | TCTGGGTGAAGGAGAGTTTGG      | TCCCGCTGTGAAGAGTTGTC     |
| <i>TYRO3</i> | CCACTGTTCACTTCAAGCA        | CCTGTGTCACCTGAACTGTAC    |
| <i>GAS6</i>  | ACTTCTTCTGCCTGTGTAAAGC     | TCCTGGCTGCATTCGTTGAC     |
| <i>GAPDH</i> | ATCTTCTTTTGCCTCGCCAG       | TTCCCATGGTGTCTGAGC       |
